# Supplementary material for: Supramolecular Co-adsorption on TiO2 to enhance the efficiency of dye-sensitized solar cells
Source: Royal Society of Chemistry journal article supplement (doi:10.1039/d1ta00807b), 2021-01-01
Supplement: d1ta00807b1.pdf [file d1ta00807b1.pdf]

## Supramolecular Co-adsorption on TiO<sub>2</sub> to Enhance the Efficiency of Dye-Sensitized Solar Cells

Jincheng An<sup>†a</sup>, Zhifeng Tian<sup>†a</sup>, Li Zhang<sup>a</sup>, Xichuan Yang<sup>a\*</sup>, Bin Cai<sup>a</sup>, Ze Yu<sup>a</sup>, Liyan Zhang<sup>a</sup>, Anders Hagfeldt<sup>b</sup>, Licheng Sun<sup>ac</sup>

<sup>a</sup>State Key Laboratory of Fine Chemicals, Institute of Artificial Photosynthesis, DUT–KTH Joint Education and Research Center on Molecular Devices, Dalian University of Technology (DUT), 2 Linggong Rd., 116024 Dalian, China E-mail: [yangxc@dlut.edu.cn](mailto:yangxc@dlut.edu.cn).

<sup>b</sup>Laboratory of Photomolecular Science, Institute of Chemical Sciences and Engineering, École Polytechnique Fédérale de Lausanne, CH-1015-Lausanne, Switzerland. E-mail: [sunlc@dlut.edu.cn](mailto:sunlc@dlut.edu.cn).

<sup>c</sup>Department of Chemistry, School of Chemical Science and Engineering, KTH Royal Institute of Technology, 10044 Stockholm, Sweden. E-mail: [anders.hagfeldt@epfl.ch](mailto:anders.hagfeldt@epfl.ch).

† These authors contributed equally to this work.

### 1. Materials

All the solvents and chemicals were purchased from Energy Chemical and used as received unless specifically stated. 18-NRT transparent Titania paste was purchased from Dyesol. The copper electrolyte, (Cu<sup>III</sup>(tmby)<sub>2</sub>TFSI<sub>1/2</sub>), was purchased from Dyenamo AB., Sweden. The counter electrodes (Pt-coated FTO conducting glass) and Surlyn films (25 μm), TPP200 were achieved from Dalian HeptaChroma SolarTech Co. Ltd.

### 2. Measurements

<sup>1</sup>H NMR spectra were recorded (VARIAN INOVA 500 MHz spectrometer, USA) using tetramethyl silane as standard. MS data were obtained by means of GCT CA156 (UK), HP1100 LC/MSD (USA), and LC/Q-TOF MS (UK). The absorption spectra were recorded on HP8453 (USA). Electrochemical redox potentials were obtained by performing cyclic voltammetry (CV) on an electrochemical workstation (BAS100B, USA). The *J*-*V* curves are recorded at a scan rate of 10 mV s<sup>-1</sup>. The incident photon-to-current conversion efficiency (IPCE) spectra were obtained by a Hypermono-light (SM-25, Jasco Co. Ltd., Japan). A standard silicon solar cell was used as reference before the measurement.

Ultraviolet photoelectron spectra (UPS) were carried out in an integrated ultrahigh vacuum (UHV) system equipped with multi-technique surface analysis system photoelectron spectrometer (Thermo Fisher, ESCALAB XI+, UK). An Ar ion gun was performed for 15 s before measuring. The scale of the binding energy (BE) was calibrated against Au (4f<sub>7/2</sub>). UPS were measured with a negative bias voltage (-10 V) applied to the samples using the He (I) (21.2 eV) line in order to shift the spectra from the spectrometer threshold.

### 3. Synthesis of AJ502, TZ101, TZ102 dyes

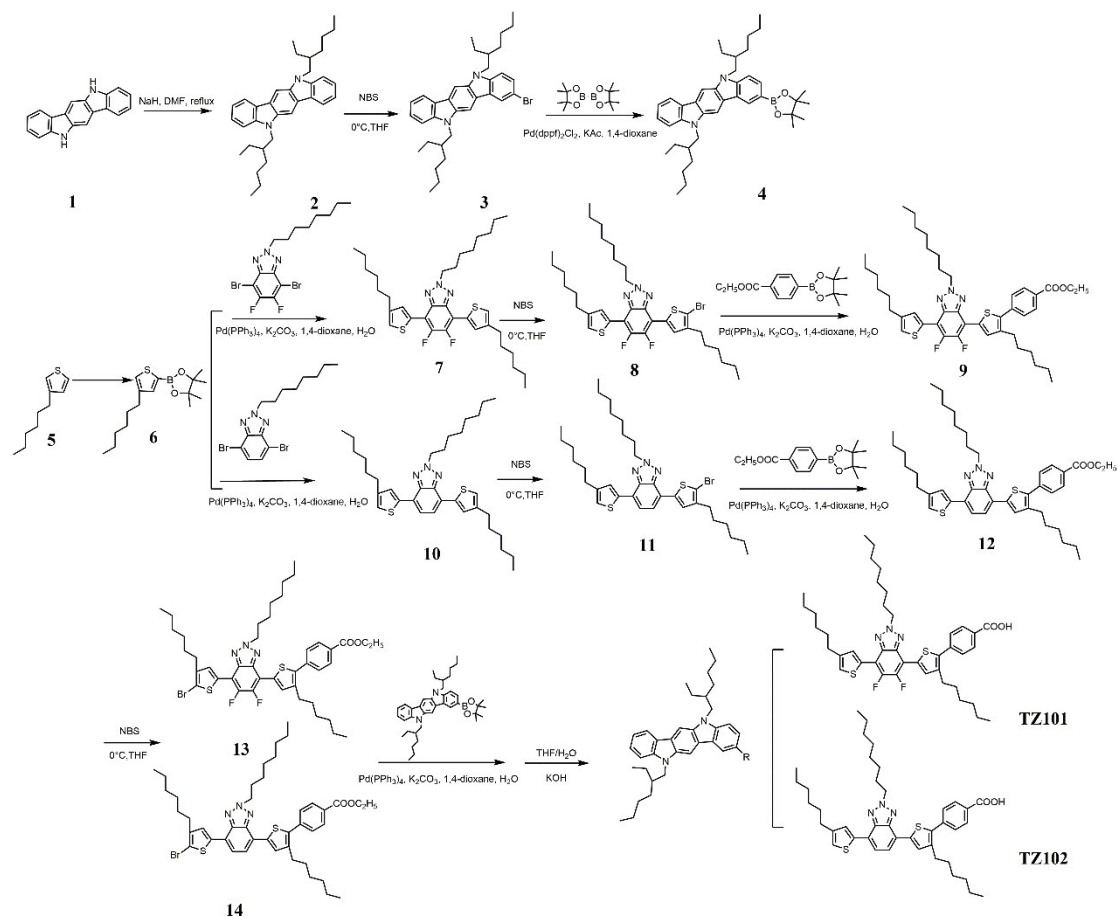

**Scheme S1.** The synthetic routes of **TZ101**

**Compound 2 (5,11-bis(2-ethylhexyl)-5,11-dihydroindolo[3,2-b] carbazole):** A mixture of Indolo [3, 2-*b*] carbazole, 5, 11-dihydro (1) (3 g, 11.7 mmol), NaH (0.62 g, 25.8 mmol) were dissolved in 70 mL DMF and stirred 1 h under room temperature. Then, 2-ethylhexyl bromide (5.0 g, 25.8 mmol) was added and the mixture was allowed to reflux overnight. The cooled resulting liquid was extracted with CH<sub>2</sub>Cl<sub>2</sub> and water, dried with MgSO<sub>4</sub>. The organic solvent was removed under reduced pressure and the product was purified by silica gel chromatography using petroleum ether: CH<sub>2</sub>Cl<sub>2</sub> = 5:1 as yellow oil (80.3%). IR (cm<sup>-1</sup>) 3051  $\nu_{\text{=CH}}$ ; 2971  $\nu_{\text{-CH}^{\text{as}}}$ ; 2853  $\nu_{\text{-CH}^{\text{s}}}$ ; 1605, 1509, 1475  $\nu$  benzene ring; 1467  $\delta_{\text{CH}}$ ; 1370  $\nu_{\text{-C-N}}$ ; 721  $\nu_{\text{-(CH}_2\text{)}_n}$ . <sup>1</sup>H NMR (500 MHz, CDCl<sub>3</sub>)  $\delta$  8.20 (d, *J*=7.5 Hz, 2H), 7.99 (s, 2H), 7.48 (t, *J*=7.5 Hz, 1H), 7.40 (d, *J*=8.0 Hz, 2H), 7.23 (t, *J*=7.0 Hz, 2H), 4.31 - 4.23 (m, 4H), 2.22 - 2.18 (m, 2H), 1.51 - 1.38 (m, 12H), 1.36 - 1.26 (m, 4H), 0.97 - 0.87 (t, 12H). (GC/Q-TOF, *m/z*) Calculated for C<sub>34</sub>H<sub>44</sub>N<sub>2</sub> (M<sup>+</sup>): 480.3504; Found, 480.3507.

**Compound 3 (2-bromo-5,11-bis(2-ethylhexyl)-5,11-dihydroindolo [3,2 -*b*] carbazole):** Compound 2 (2 g, 4.2 mmol) was added in 30 mL THF, NBS (0.74 g, 4.2 mmol) was added slowly under ice bath. The mixture was extracted with CH<sub>2</sub>Cl<sub>2</sub> and water and dried with MgSO<sub>4</sub> after string for 2 h. The solvent was removed by rotary evaporation and the product was obtained by chromatography using CH<sub>2</sub>Cl<sub>2</sub>: petroleum ether (PE) = 1:5 as yellow oil (64.1%). IR (cm<sup>-1</sup>) 3053  $\nu_{\text{=CH}}$ ; 2953  $\nu_{\text{-CH}^{\text{as}}}$ ; 2863  $\nu_{\text{-CH}^{\text{s}}}$ ; 1611, 1511, 1475  $\nu$  benzene ring; 1467  $\delta_{\text{CH}}$ ; 1376  $\nu_{\text{-C-N}}$ ; 721  $\nu_{\text{-(CH}_2\text{)}_n}$ . <sup>1</sup>H NMR (500 MHz, CDCl<sub>3</sub>)  $\delta$  8.27 (s, 1H), 8.19 (d, *J*=8.0 Hz, 1H), 7.94 (s, 2H), 7.53- 7.47 (m, *J*=8.5 Hz, 2H), 7.39 (t, *J*=7.0 Hz, 2H), 7.23 (t, *J*=7.0 Hz, 1H), 4.31-4.23 (m, 4H), 2.18 - 2.13 (m, 2H), 1.53 - 1.38 (m, 12H), 1.35-1.26 (m, 4H), 0.97-0.87 (t, 12H). (GC/Q-TOF, *m/z*). Calculated for C<sub>34</sub>H<sub>43</sub>N<sub>2</sub>Br (M<sup>+</sup>): 558.2610; Found, 558.2613.

**Compound 4 (5,11-bis(2-ethylhexyl)-2-(4,4,5,5-tetramethyl-1,3,2-dioxaborolan-2-yl)-5,11-dihydroindolo[3,2-*b*] carbazole):** Compound 3(1.5 g, 2.68 mmol), bis(pinacolato) diboron (0.68 g, 2.68 mmol), KAc (1.31 g, 13.4

mmol) was added into 50 mL 1,4-dioxane and bubbled with nitrogen for 15min. After that, the Pd (dppf)<sub>2</sub>Cl<sub>2</sub> (0.16 g, 2.1 mmol) were added into the flask. The mixture was allowed to heat at 85 °C for 12 h under nitrogen atmosphere and then extracted with CH<sub>2</sub>Cl<sub>2</sub> and water. The product was obtained by chromatography using CH<sub>2</sub>Cl<sub>2</sub>: petroleum ether = 1:2 after removing the organic solvent as yellow solid (67.3%). Melting point: 60-62 °C. IR (cm<sup>-1</sup>) 3054 ν<sub>=CH</sub>; 2961 ν<sub>-CH<sup>as</sup></sub>, 2853 ν<sub>-CH<sup>s</sup></sub>; 1613, 1511, 1485 ν benzene ring; 1467 δ<sub>-CH</sub>; 1376 ν<sub>-C-N</sub>; 721 ν<sub>-(CH<sub>2</sub>)<sub>n</sub></sub>. <sup>1</sup>H NMR (500 MHz, CDCl<sub>3</sub>) δ 8.68 (s, 1H), 8.17 (d, *J*=8.0 Hz, 1H), 8.01 (s, 1H), 7.95 (d, *J*=8.0 Hz, 1H), 7.91 (s, 1H), 7.54- 7.50 (t, *J*=8.0 Hz, *J*=7.5 Hz, 1H), 7.36 (d, *J*=8.5 Hz, 2H), 7.23 (m, *J*=7.5 Hz, 1H), 4.22-4.13 (m, 4H), 2.25 - 2.07 (m, 2H), 1.47 - 1.24 (m, 28H), 0.97 - 0.87 (t, 12H). (GC/Q-TOF, *m/z*) Calculated for C<sub>40</sub>H<sub>55</sub>BN<sub>2</sub>O<sub>2</sub> (M<sup>+</sup>): 606.4357; Found, 606.4352.

**Compound 6** was synthesized followed the cited literature procedures.<sup>1</sup>

**Compound 7 (5,6-difluoro-4,7-bis(4-hexylthiophen-2-yl)-2-octyl-2H-benzo[d][1,2,3]triazole):** Compound 6 (2.0 g, 6.8 mmol) and 4,7-dibromo-5,6-difluoro-2-octyl-2H-benzo[d][1,2,3] triazole (1.0 g, 2.36 mmol) and K<sub>2</sub>CO<sub>3</sub> (4.7 g, 34.0 mmol) were added into 70 mL 1,4-dioxane and 15 mL H<sub>2</sub>O. The mixed solution was bubbled with nitrogen for 15min. After that, the Pd (PPh<sub>3</sub>)<sub>4</sub> (0.78g, 0.68mmol) were added into the flask. The mixture was allowed to heat at 85 °C for 12 h under nitrogen atmosphere. The resulting reaction was extracted with CH<sub>2</sub>Cl<sub>2</sub> and water and the organic solvent was washed three times.<sup>2,3</sup> The product was purified by silica gel chromatography using petroleum ether: CH<sub>2</sub>Cl<sub>2</sub> = 7:1 as light-yellow powder (74.3%). Melting point: 71-73 °C. IR (cm<sup>-1</sup>) 3097 ν<sub>=CH</sub>; 2961 ν<sub>-CH<sup>as</sup></sub>, 2854 ν<sub>-CH<sup>s</sup></sub>; 1600, 1485 ν benzene ring; 1580 ν<sub>-C=N</sub>; 1457 δ<sub>-CH</sub>; 1445-ν<sub>-C-N(electron-withdrawing group)</sub>; 1370 ν<sub>-C-N</sub>; 722 ν<sub>-(CH<sub>2</sub>)<sub>n</sub></sub>. <sup>1</sup>H NMR (500 MHz, CDCl<sub>3</sub>) δ 8.04 (s, 2H), 7.06 (s, 2H), 4.74 (t, 2H), 2.66 (t, 4H), 2.14-2.08 (m, 2H), 1.66 - 1.60 (m, 4H), 1.47 (m, 2H), 1.36 - 1.19 (m, 20H), 0.85-0.78 (t, 9H). (GC/Q-TOF, *m/z*). Calculated for C<sub>34</sub>H<sub>47</sub>F<sub>2</sub>N<sub>3</sub>S<sub>2</sub> (M<sup>+</sup>): 599.3179; Found, 599.3169.

**Compound 10 (4,7-bis(4-hexylthiophen-2-yl)-2-octyl-2H-benzo[d][1,2,3]triazole)** was synthesized as light-yellow powder with the same procedure for Compound 7. Melting point: 67-69 °C. IR (cm<sup>-1</sup>) 3040 ν<sub>=CH</sub>; 2956 ν<sub>-CH<sup>as</sup></sub>, 2857 ν<sub>-CH<sup>s</sup></sub>; 1600, 1505, 1485 ν benzene ring; 1575 ν<sub>-C=N</sub>; 1469 δ<sub>-CH</sub>; 1443-ν<sub>-C-N(electron-withdrawing group)</sub>; 1379 ν<sub>-C-N</sub>; 726 ν<sub>-(CH<sub>2</sub>)<sub>n</sub></sub>. <sup>1</sup>H NMR (500 MHz, CDCl<sub>3</sub>) δ 7.91 (s, 2H), 7.74 (s, 2H), 7.04 (s, 2H), 4.83 (t, 2H), 2.67 (t, 4H), 2.20-2.17 (m, 2H), 1.70-1.68 (m, 4H), 1.43 (m, 2H), 1.39 - 1.19 (m, 20H), 0.89-0.77 (t, 9H). (GC/Q-TOF, *m/z*) Calculated for C<sub>34</sub>H<sub>49</sub>N<sub>3</sub>S<sub>2</sub> (M<sup>+</sup>): 563.3368; Found, 563.3359.

**Compound 8 (4-(5-bromo-4-hexylthiophen-2-yl)-5,6-difluoro-7-(4-hexylthiophen-2-yl)-2-octyl-2H-benzo[d][1,2,3] triazole)** Compound 7 (0.5 g, 0.83 mmol) was added in 30 mL THF under ice bath, and then N-Bromosuccinimide (NBS) (0.15 g, 0.83 mmol) was added slowly in 5 h, and then string overnight at room temperature. The reaction mixture was poured onto water and extracted with CH<sub>2</sub>Cl<sub>2</sub> and the solvent was removed under reduced pressure. The compound 8 was rapidly purified by chromatography (petroleum ether: CH<sub>2</sub>Cl<sub>2</sub>=2:1) without serious separation after removing the organic solvent as yellow solid. Because the bromine produced is too difficult to separate from the raw material in mixed product.

**Compound 11 (4-(5-bromo-4-hexylthiophen-2-yl)-7-(4-hexylthiophen-2-yl)-2-octyl-2H-benzo[d][1,2,3] triazole)** was synthesized as light-yellow powder with the same procedure for Compound 8.

**Compound 9 (ethyl 4-(5-(5,6-difluoro-7-(4-hexylthiophen-2-yl)-2-octyl-2H-benzo[d][1,2,3]triazol-4-yl)-3-hexylthiophen-2-yl)benzoate):**The crude compound 8, 4-(4,4,5,5-tetramethyl-1,3,2-dioxaborolan-2-yl) phenyl propionate (0.138 g, 0.5 mmol), K<sub>2</sub>CO<sub>3</sub>(0.3 g, 2.2 mmol), Pd(PPh<sub>3</sub>)<sub>4</sub> (0.05 g, 0.044 mmol) were added into 50 mL 1,4-dioxane and 10mL H<sub>2</sub>O under N<sub>2</sub> atmosphere. The mixture was heated at 85 °C for overnight. The organic was extracted with CH<sub>2</sub>Cl<sub>2</sub> and water and the solvent were removed by rotary evaporation. The residue was purified by chromatography (petroleum ether: CH<sub>2</sub>Cl<sub>2</sub>=2:1) to provide compound 9 as yellow solid. Melting point: 53-55 °C. IR (cm<sup>-1</sup>) 3040 ν<sub>=CH</sub>; 2956 ν<sub>-CH<sup>as</sup></sub>, 2857 ν<sub>-CH<sup>s</sup></sub>; 1605, 1505, 1485 ν benzene ring; 1584 ν<sub>-C=N</sub>; 1720 ν<sub>-C=O</sub>; 1469 δ<sub>-CH</sub>; 1446-ν<sub>-C-N(electron-withdrawing group)</sub>; 1369 ν<sub>-C-N</sub>; 726 ν<sub>-(CH<sub>2</sub>)<sub>n</sub></sub>. <sup>1</sup>H NMR (500 MHz, CDCl<sub>3</sub>) δ 8.16 (s, 1H), 8.12 (d, *J* = 8.0

Hz, 2H), 8.10 (s, 1H), 7.61 (d,  $J = 8.5$  Hz, 2H), 7.14 (s, 1H) 4.80 (t, 2H), 4.42 (q, 2H), 2.77 (t, 4H), 2.20-2.17 (m, 2H), 1.70-1.68 (m, 4H), 1.43 (m, 2H), 1.39-1.19 (m, 23H), 0.89-0.77 (t, 9H). (GC/Q-TOF,  $m/z$ ). Calculated for  $C_{43}H_{55}F_2N_3O_2S_2$  ( $M^+$ ): 747.3704; Found, 747.3711.

**Compound 12 (ethyl 4-(3-hexyl-5-(7-(4-hexylthiophen-2-yl)-2-octyl-2H-benzo[d][1,2,3]triazol-4-yl)thiophen-2-yl)benzoate)** was synthesized as light-yellow powder with the same procedure for Compound 9. Melting point: 50-52°C. IR ( $cm^{-1}$ ) 3061  $\nu_{-CH}$ ; 2956  $\nu_{-CH^{as}}$ , 2846  $\nu_{-CH^s}$ ; 1600, 1504, 1464  $\nu$  benzene ring; 1572  $\nu_{-C=N}$ ; 1720  $\nu_{-C=O}$ ; 1469  $\delta_{-CH}$ ; 1440  $\nu_{-C-N}$ (electron-withdrawing group); 1379  $\nu_{-C-N}$ ; 726  $\nu_{-(CH_2)_n}$ .  $^1H$  NMR (500 MHz,  $CDCl_3$ )  $\delta$  8.12 (d,  $J = 8.0$  Hz, 2H), 7.96 (d, 2H), 7.67 (s, 1H), 7.60 (s,  $J = 8.5$  Hz, 1H), 7.58 (s, 1H), 6.97 (s, 1H) 4.85 (t, 2H), 4.44 (q, 2H), 2.67 (t, 4H), 2.21-2.17 (m, 2H), 1.7 - 1.68 (m, 4H), 1.45 (m, 2H), 1.45 - 1.19 (m, 23H), 0.92 - 0.85 (t, 9H). (GC/Q-TOF,  $m/z$ ). Calculated for  $C_{43}H_{57}N_3O_2S_2$  ( $M^+$ ): 711.3892; Found, 711.3889.

**Compound 13 (ethyl 4-(5-(7-(5-bromo-4-hexylthiophen-2-yl)-5,6-difluoro-2-octyl-2H-benzo[d][1,2,3]triazol-4-yl)-3-hexylthiophen-2-yl)benzoate)**: was synthesized as light-yellow oil with the same procedure for Compound 7. IR ( $cm^{-1}$ ) 3061  $\nu_{-CH}$ ; 2962  $\nu_{-CH^{as}}$ , 2841  $\nu_{-CH^s}$ ; 1605, 1516, 1458  $\nu$  benzene ring; 1581  $\nu_{-C=N}$ ; 1710  $\nu_{-C=O}$ ; 1469  $\delta_{-CH}$ ; 1449  $\nu_{-C-N}$ (electron-withdrawing group); 1379  $\nu_{-C-N}$ ; 1281  $\nu_{-C-O-C}$ ; 726  $\nu_{-(CH_2)_n}$ .  $^1H$  NMR (500 MHz,  $CDCl_3$ )  $\delta$  8.12 (s, 1H), 8.11 (d,  $J = 8.0$  Hz, 2H), 7.91 (s, 1H), 7.59 (d,  $J = 8.5$  Hz, 2H), 4.77 (t, 2H), 4.42 (q, 2H), 2.74 (t, 1H), 2.63 (t, 4H), 1.70-1.68 (m, 4H), 1.45 (m, 2H), 1.37 - 1.18 (dd, 23H), 0.89 (d, 9H). (GC/Q-TOF,  $m/z$ ). Calculated for  $C_{43}H_{54}BrF_2N_3O_2S_2$  ( $M^+$ ): 825.2809; Found, 825.2812.

**Compound 14 (ethyl 4-(5-(7-(5-bromo-4-hexylthiophen-2-yl)-2-octyl-2H-benzo[d][1,2,3]triazol-4-yl)-3-hexylthiophen-2-yl)benzoate)** was synthesized as light-yellow oil with the same procedure for Compound 13. IR ( $cm^{-1}$ ) 3051  $\nu_{-CH}$ ; 2956  $\nu_{-CH^{as}}$ , 2862  $\nu_{-CH^s}$ ; 1610, 1510, 1458  $\nu$  benzene ring; 1569  $\nu_{-C=N}$ ; 1715  $\nu_{-C=O}$ ; 1469  $\delta_{-CH}$ ; 1442  $\nu_{-C-N}$ (electron-withdrawing group); 1385  $\nu_{-C-N}$ ; 1281  $\nu_{-C-O-C}$ ; 726  $\nu_{-(CH_2)_n}$ .  $^1H$  NMR (500 MHz,  $CDCl_3$ )  $\delta$  8.12 (d,  $J = 8.0$  Hz, 2H), 7.95 (s, 2H), 7.72 (s, 1H), 7.67 (s, 1H), 7.57 (d,  $J = 8.5$  Hz, 2H), 4.82 (t, 2H), 4.42 (q, 2H), 2.77 (t, 4H), 2.23-2.17 (m, 2H), 1.71-1.66 (m, 4H), 1.47 (m, 2H), 1.43-1.16 (m, 23H), 0.91-0.78 (t, 9H). (GC/Q-TOF,  $m/z$ ). Calculated for  $C_{42}H_{56}BrF_2N_3O_2S_2$  ( $M^+$ ): 789.2997; Found, 789.2989.

**TF101 (4-(5-(7-(5-(5,11-bis(2-ethylhexyl)-5,11-dihydroindolo[3,2-b]carbazol-3-yl)-4-hexylthiophen-2-yl)-5,6-difluoro-2-octyl-2H-benzo[d][1,2,3]triazol-4-yl)-3-hexylthiophen-2-yl)benzoic acid)**: Compound 13 (200 mg, 0.25 mmol), compound 4 (150 mg, 0.25 mmol),  $K_2CO_3$  (13.8 mg, 1 mmol) in 35 mL 1,4-dioxane, 10 mL  $H_2O$  was added under  $N_2$ . After that, the Pd ( $PPh_3$ )<sub>4</sub> (28 mg, 0.025 mmol) were added into the flask. The mixture was allowed to heat at 85 °C for 12 h and then extracted with  $CH_2Cl_2$  and water. The combined organic layers are dried over anhydrous magnesium sulfate and concentrated under reduced pressure to leave a yellow solid, which is purified by chromatography on silica gel using  $CH_2Cl_2$ :  $CH_3OH$  (20:1, v/v) to afford 273 mg orange solid (78%). After then, the product was dissolved in  $H_2O$  (10 mL), and THF (30 mL), KOH (0.38 g, 0.07 mmol) dissolved in water was added and refluxed 20 h. After cooling to room temperature, 2 M HCl was added slowly in 2 h for neutralizing to pH=1-3, the organic was collected and evaporated to obtain an orange solid. The residue was purified by chromatography using  $CH_2Cl_2$  to provide **TZ101** as an orange solid (260 mg). Melting point: 88-90 °C. IR ( $cm^{-1}$ ) 3057  $\nu_{-CH}$ ; 2953  $\nu_{-CH^{as}}$ , 2849  $\nu_{-CH^s}$ ; 1598, 1504  $\nu$  benzene ring; 1583  $\nu_{-C=N}$ ; 1687  $\nu_{-C=O}$ ; 1469  $\delta_{-CH}$ ; 1446  $\nu_{-C-N}$ (electron-withdrawing group); 1385  $\nu_{-C-N}$ ; 1281  $\nu_{-C-O-C}$ ; 727  $\nu_{-(CH_2)_n}$ .  $^1H$  NMR (500 MHz,  $CDCl_3$ )  $\delta$  8.32 (s, 1H), 8.22 (s, 1H), 8.19 (s, 1H), 8.17 (s, 1H), 8.13 (d,  $J = 8.5$  Hz, 2H), 7.99 (s, 2H), 7.64 (d, 1H), 7.60 (d,  $J = 8.5$  Hz, 2H), 7.50 (d,  $J = 8.0$  Hz, 1H), 7.44-7.39 (m,  $J = 8.5$  Hz, 2H), 7.22 (m,  $J = 7.5$  Hz, 1H), 4.80 (t, 2H), 4.25 (d, 4H), 2.88 (d, 2H), 2.23 (m, 2H), 1.81 (m, 4H), 1.58 - 1.22 (m, 32H), 1.00 - 0.83 (m, 21H).  $^{13}C$  NMR (100 MHz,  $CDCl_3$ ) 171.4, 142.7, 142.2, 141.6, 140.4, 140.1, 138.8, 138.5, 137.8, 136.8, 136.7, 132.9, 131.8, 130.5, 129.3, 128.5, 127.9, 127.3, 125.7, 123.9, 123.1, 122.7, 122.5, 121.0, 120.1, 117.95, 110.6, 108.9, 99.1, 72.2, 67.9, 61.8, 56.8, 47.8, 39.4, 31.8, 31.1, 29.7, 29.5, 29.3, 28.9, 26.6, 24.6, 23.1, 22.6, 14.1, 11.0. MS (MALDI-TOF) Calculated for  $C_{75}H_{93}F_2N_5O_2S_2$  ( $M^+$ ): 1197.6739; Found, 1197.6781.

**TZ102 (4-(5-(7-(5-(5,11-bis(2-ethylhexyl)-5,11-dihydroindolo[3,2-b]carbazol-2-yl)-4-hexylthiophen-2-yl)-2-octyl-2H-benzo[d][1,2,3]triazol-4-yl)-3-hexylthiophen-2-yl)benzoic acid)** was synthesized as light-yellow powder with the same procedure for Compound TZ101. Melting point: 85-87 °C. IR (cm<sup>-1</sup>) 3051  $\nu_{\text{=CH}}$ ; 2958  $\nu_{\text{-CH}}^{\text{as}}$ , 2859  $\nu_{\text{-CH}}^{\text{s}}$ ; 1602, 1504  $\nu$  benzene ring; 1573  $\nu_{\text{-C=N}}$ ; 1682  $\nu_{\text{-C=O}}$ ; 1464  $\delta_{\text{-CH}}$ ; 1447  $\nu_{\text{-C-N}}$ (electron-withdrawing group); 1385  $\nu_{\text{-C-N}}$ ; 1276  $\nu_{\text{-C-O-C}}$ ; 727  $\nu_{\text{-(CH}_2\text{)}_n}$ . <sup>1</sup>H NMR (500 MHz, CDCl<sub>3</sub>)  $\delta$  8.32 (s, 1H), 8.21 (s, 1H), 8.19 (s, 1H), 8.13 (d,  $J$  = 8.5 Hz, 2H), 8.00 (s, 2H), 7.63(d, 1H), 7.64 (d,  $J$  = 8.5 Hz, 1H), 7.60 (d,  $J$  = 8.5 Hz, 2H), 7.48 (d, 1H), 7.43-7.39 (m, 2H), 7.23 (m,  $J$  = 7.5 Hz, 1H), 4.86 (t, 2H), 4.27 (d, 4H), 2.78 (d, 2H), 2.22 (m, 2H), 1.81 (m, 4H), 1.48 - 1.31 (m, 32H), 0.95- 0.86 (m, 21H). <sup>13</sup>C NMR (100 MHz, CDCl<sub>3</sub>) 171.5, 142.2, 142.1, 141.6, 141.1, 140.4, 139.4, 136.9, 136.6, 130.9, 130.5, 129.8, 129.3, 129.0, 127.7, 127.2, 125.7, 125.2, 124.3, 123.0, 122.7, 122.6, 122.1, 121.0, 120.1, 117.9, 108.7, 99.1, 72.3, 61.8, 56.8, 47.8, 39.4, 31.8, 31.1, 30.1, 29.7, 29.3, 29.1, 28.9, 26.7, 24.6, 23.1, 22.7, 14.1, 11.06. MS (MALDI-TOF) Calculated for C<sub>75</sub>H<sub>95</sub>N<sub>5</sub>O<sub>2</sub>S<sub>2</sub> (M<sup>+</sup>): 1161.6927; Found, 1161.6946.

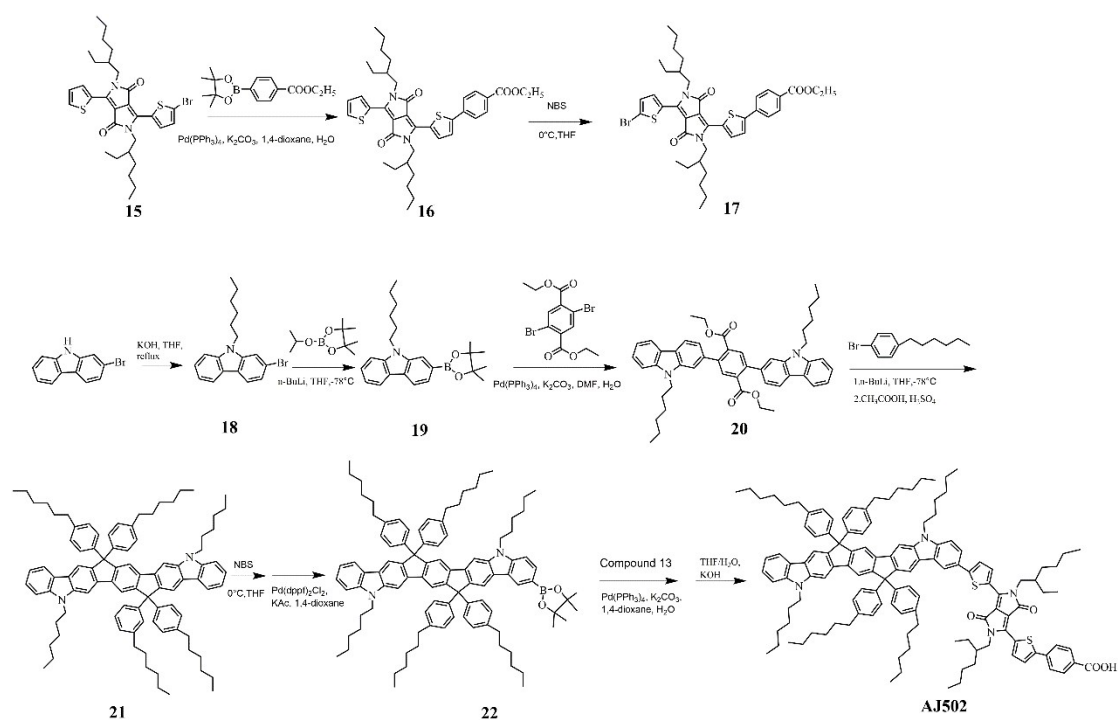

**Scheme S2.** The synthetic routes of **AJ502**

**Compound 16 (ethyl 4-(5-(2,5-bis(2-ethylhexyl)-3,6-dioxo-4-(thiophen-2-yl)-2,3,5,6-tetrahydropyrrolo[3,4-c]pyrrol-1-yl)thiophen-2-yl)benzoate):** To a solution of compound 11 (1.0 g, 1.67 mmol), K<sub>2</sub>CO<sub>3</sub> (1.15 g, 8.4 mmol), ethyl 4-(4,4,5,5-tetramethyl-1,3,2-dioxaborolan-2-yl) benzoate (0.5 g, 1.84 mmol), in 50 mL 1,4-dioxane and 10mL H<sub>2</sub>O, After that, the Pd(PPh<sub>3</sub>)<sub>4</sub> (0.2 g, 0.17 mmol) were added into the flask. The mixture was allowed to heat at 85 °C for 12 h. The mixture was allowed to stir overnight and extracted with CH<sub>2</sub>Cl<sub>2</sub> and water. The organic solvent was removed under reduced pressure and the organic solvent was removed under reduced pressure and the residue was purified by column chromatography on silica gel using CH<sub>2</sub>Cl<sub>2</sub> :PE = 1:1 (v/v) to give the product as a blue-dark solid. (75%). Melting point: 156-158 °C. IR (cm<sup>-1</sup>) 3076  $\nu_{\text{=CH}}$ ; 2952  $\nu_{\text{-CH}}^{\text{as}}$ , 2859  $\nu_{\text{-CH}}^{\text{s}}$ ; 1605, 1504  $\nu$  benzene ring; 1668  $\nu_{\text{-C=O}}$ (acylamino); 1715  $\nu_{\text{-C=O}}$ (carbamido); 1464  $\delta_{\text{-CH}}$ ; 1442  $\nu_{\text{-C-N}}$ ; 1275  $\nu_{\text{-C-O-C}}$ ; 727  $\nu_{\text{-(CH}_2\text{)}_n}$ . <sup>1</sup>H NMR (500 MHz, CDCl<sub>3</sub>)  $\delta$  8.94 (d,  $J$  = 4.0 Hz, 2H), 8.10 (d,  $J$  = 8.0 Hz, 2H), 7.74 (d,  $J$  = 8.0 Hz, 2H), 7.65 (d,  $J$  = 6 Hz, 1H),

7.56 (d,  $J = 4.0$  Hz, 1H), 7.28 (d,  $J = 5.0$  Hz, 1H), 4.43 (q, 2H), 4.10 - 4.00 (m, 4H), 1.92 (t, 2H), 1.42-1.24 (m, 22H), 0.99 - 0.81 (m, 6H). MS (MALDI-TOF) Calculated for  $C_{39}H_{48}N_2O_4S_2$  ( $M^+$ ): 672.3055; Found, 672.3043.

**Compound 17 (ethyl 4-(5-(4-(5-bromothiophen-2-yl)-2,5-bis(2-ethylhexyl)-3,6-dioxo-2,3,5,6-tetrahydropyrrolo[3,4-c]pyrrol-1-yl)thiophen-2-yl)benzoate)** was synthesized as blue-dark powder with the same procedure for Compound 3. Melting point: 175-1176 °C. IR ( $cm^{-1}$ ) 3082  $\nu_{-CH}$ ; 2956  $\nu_{-CH^{as}}$ , 2852  $\nu_{-CH^s}$ ; 1605, 1504  $\nu$  benzene ring; 1663  $\nu_{C=O(acylamino)}$ ; 1720  $\nu_{C=O(carbamido)}$ ; 1464  $\delta_{-CH}$ ; 1446  $\nu_{C-N}$ ; 1275  $\nu_{C-O-C}$ ; 727  $\nu_{(CH_2)n-}$ .  $^1H$  NMR (500 MHz,  $CDCl_3$ )  $\delta$  8.95 (d,  $J = 4.0$  Hz 2H), 8.66 (d,  $J = 4.5$  Hz, 1H), 8.10 (d,  $J = 8.5$  Hz, 2H), 7.74 (d,  $J = 8.5$  Hz, 2H), 7.56 (d,  $J = 4.5$  Hz, 1H), 7.22 (d,  $J = 5.0$  Hz 1H), 4.43 (q, 2H), 4.10 - 4.00 (m, 4H), 1.92 (t, 2H), 1.42-1.24 (m, 22H), 0.99 - 0.81 (m, 6H). MS (MALDI-TOF) Calculated for  $C_{39}H_{47}BrN_2O_4S_2$  ( $M^+$ ): 750.2161; Found, 750.2158.

**Compound 18 (2-bromo-9-hexyl-9H-carbazole)**

A mixture of 2-bromo-9H-carbazole (5.0 g, 20.4 mmol), KOH (2.3g, 40.8 mmol) were dissolved in 70 mL THF and stirred 2 h under room temperature. Then, 2-ethylhexyl bromide (5.0 g, 30.6mmol) was added and the mixture was allowed to reflux overnight.<sup>4,5</sup>The cooled resulting liquid was extracted with  $CH_2Cl_2$  and water, dried with  $MgSO_4$ . The organic solvent was removed under reduced pressure and the product was purified by silica gel chromatography using petroleum ether:  $CH_2Cl_2 = 5:1$  as white oil product (90.5%). IR ( $cm^{-1}$ ) 3056  $\nu_{-CH}$ ; 2941  $\nu_{-CH^{as}}$ , 2852  $\nu_{-CH^s}$ ; 1605, 1504  $\nu$  benzene ring; 1463  $\delta_{-CH}$ ; 1364  $\nu_{C-N(donor)}$ ; 727  $\nu_{(CH_2)n-}$ .  $^1H$  NMR (500 MHz,  $CDCl_3$ )  $\delta$  8.06 (d,  $J=8.0$  Hz, 1H), 7.94 (d,  $J=8.5$  Hz, 1H), 7.54(s, 1H), 7.48 (t,  $J=7.5$  Hz, 1H), 7.40 (d,  $J=8.0$  Hz, 1H), 7.33 (d,  $J=8.5$  Hz, 1H), 7.23 (t,  $J=7.5$  Hz, 1H), 4.24 (t, 2H), 1.88 (m, 2H), 1.40-1.27 (m, 6H), 0.89-0.85 (m, 3H). MS (MALDI-TOF) Calculated for  $C_{18}H_{20}BrN$ : 329.0779 ( $M^+$ ); Found, 329.0767.

**Compound 19 (9-hexyl-2-(4,4,5,5-tetramethyl-1,3,2-dioxaborolan-2-yl)-9H-carbazole)** The compound 8 (5.0 g, 13.2 mmol) was dissolved in dry 70 mL THF and stirred under room temperature. Then, n-BuLi (5.8 mL, 14.5 mmol) was added for 1h at -78 °C. After that, Keeping the temperature for 1h, followed isopropoxyboronic acid pinacol ester (2.7 g, 14.7 mmol) was added into the flask to stir overnight. The mixed liquid was extracted with  $CH_2Cl_2$  and water, dried with  $MgSO_4$ . The organic solvent was removed under reduced pressure and the product was purified by silica gel chromatography using petroleum ether:  $CH_2Cl_2 = 2:1$  as white oil product (80.2 %). Melting point: 82-84 °C. IR ( $cm^{-1}$ ) 3051  $\nu_{-CH}$ ; 2971  $\nu_{-CH^{as}}$ , 2862  $\nu_{-CH^s}$ ; 1600, 1504  $\nu$  benzene ring; 1463  $\delta_{-CH}$ ; 1374  $\nu_{C-N(donor)}$ ; 720  $\nu_{(CH_2)n-}$ .  $^1H$  NMR (500 MHz,  $CDCl_3$ )  $\delta$  8.12(d,  $J=7.0$  Hz, 2H), 7.87 (s, 1H), 7.69(s,  $J=8.0$  Hz, 1H), 7.47 (t,  $J=7.5$  Hz, 1H), 7.40 (d,  $J=8.5$  Hz, 1H), 7.23 (t,  $J=7.5$  Hz, 1H), 4.35 (t, 2H), 1.88 (m, 2H), 1.40-1.28 (m, 18H), 0.89-0.85 (m, 3H). MS (MALDI-TOF) Calculated for  $C_{24}H_{32}BNO_2$  ( $M^+$ ): 377.2526; Found, 377.2517.

**Compound 20 (diethyl 2,5-bis(9-hexyl-9H-carbazol-2-yl) terephthalate):** A mixture of compound 14(1.5 g 4.0 mmol), diethyl 2,5-dibromoterephthalate (3.0 g, 8 mmol),  $K_2CO_3$  (2.76 g, 20 mmol) were added in 80 mL DMF and  $H_2O$  16mL under nitrogen. The mixed solution was bubbled with nitrogen for 15min. After that, the Pd ( $PPh_3$ )<sub>4</sub> (0.46 g, 0.4 mmol) were added into the flask. The solution was allowed to heat at 110 °C for overnight, and the solvent was extracted with  $CH_2Cl_2$  and  $H_2O$ . The organic solvent was evaporated under reduced pressure and the residue was purified by column chromatography on silica gel by  $CH_2Cl_2$ : petroleum ether=1:2 to give the product as a yellow solid. (73.2%). Melting point: 168-169 °C. IR ( $cm^{-1}$ ) 3056  $\nu_{-CH}$ ; 2956  $\nu_{-CH^{as}}$ , 2862  $\nu_{-CH^s}$ ; 1605, 1580, 1450  $\nu$  benzene

ring; 1726  $\nu_{\text{C=O(carbamido)}}$ ; 1474  $\delta_{\text{CH}}$ ; 1369  $\nu_{\text{C-N(donor)}}$ ; 1276  $\nu_{\text{C-O-C}}$ ; 727  $\nu_{\text{(CH}_2\text{)}_n}$ .  $^1\text{H NMR}$  (500 MHz,  $\text{CDCl}_3$ )  $\delta$  8.14 (d,  $J = 7.5$  Hz, 4H), 7.96 (s, 2H), 7.51-7.48 (m, 2H), 7.45-7.46 (d,  $J = 7.5$  Hz, 4H), 7.27-7.24 (m, 4H), 4.34 (q, 4H), 4.09 (t, 4H), 1.92-1.86 (m, 4H), 1.52 (m, 4H), 1.43-1.27 (m, 14H), 0.88 (t, 6H). (GC/Q-TOF, m/z) Calculated for  $\text{C}_{48}\text{H}_{52}\text{N}_2\text{O}_4$  ( $\text{M}^+$ ): 720.3927; Found, 720.3931.

**Compound 21 (5,14-dihexyl-8-(3-hexylphenyl)-8,17,17-tris(4-hexylphenyl)-5,8,14,17-tetrahydro-s-indaceno[1,2-b:5,6-b']dicarbazole):** The 4-hexyl-1-bromobenzene (4.5 g, 18.7 mmol) were added in dry THF 70 mL under  $-78^\circ\text{C}$ . After the reaction was stirred for 10 min, *n*-BuLi (8.2 mL, 20.5 mmol, 2.5 M in hexane) was added slowly for 40 min and kept the temperature for 1h, followed compound 20 (2.7 g, 3.7 mmol) was added into the flask to stir overnight. After that, the mixture was extracted with  $\text{CH}_2\text{Cl}_2$  and  $\text{H}_2\text{O}$ , the solvent was removed under reduced pressure. Then, the solid was dissolved in  $\text{CH}_3\text{COOH}$  (100 mL), one drop of concentrated  $\text{H}_2\text{SO}_4$  was added in the solvent. The solution was allowed to heat at  $110^\circ\text{C}$  for 6h. The mixture was extracted and the organic solvent was removed to give the product as a yellow solid. The crude product was purified by column chromatography on silica gel by  $\text{CH}_2\text{Cl}_2$ : petroleum ether=1:5 to give the product as a yellow solid. (65.8%). Melting point:  $85\text{-}87^\circ\text{C}$ . IR ( $\text{cm}^{-1}$ ) 3051  $\nu_{\text{=CH}}$ ; 2956  $\nu_{\text{-CH}^{\text{as}}}$ ; 2862  $\nu_{\text{-CH}^{\text{s}}}$ ; 1600, 1450  $\nu$  benzene ring; 1464  $\delta_{\text{CH}}$ ; 1363  $\nu_{\text{C-N(donor)}}$ ; 1276  $\nu_{\text{C-O-C}}$ ; 727  $\nu_{\text{(CH}_2\text{)}_n}$ .  $^1\text{H NMR}$  (500 MHz,  $\text{CDCl}_3$ )  $\delta$  8.20 (s, 2H), 7.89 (s, 2H), 7.79 (d,  $J = 8.5$  Hz, 2H), 7.62 (s, 2H), 7.49-7.46 (t,  $J = 7.5$  Hz, 2H), 7.41 (d,  $J = 8.0$  Hz, 2H), 7.32 (d,  $J = 8.0$  Hz, 8H), 7.22 (d, 2H), 7.08 (t,  $J = 8.0$  Hz, 8H), 4.34 (q, 4H), 2.57-2.50 (m, 8H), 1.93-1.87(m, 4H), 1.60 - 1.56 (m, 8H), 1.33- 1.26 (m, 36H), 0.92-0.88 (t, 18H). (GC/Q-TOF, m/z) Calculated for  $\text{C}_{92}\text{H}_{108}\text{N}_2$  ( $\text{M}^+$ ): 1240.8513. Found, 1240.8520.

**Compound 22 (5,14-dihexyl-8,8,17,17-tetrakis(4-hexylphenyl)-2-(4,4,5,5-tetramethyl-1,3,2-dioxaborolan-2-yl)-5,8,14,17-tetrahydro-s-indaceno[1,2-b:5,6-b']dicarbazole):** NBS (0.28 g, 1.6 mmol) was added in a solution of compound 16 (2.0g, 1.6mmol) in 60 mL THF at  $0^\circ\text{C}$  in 2 h. The mixture was stirred overnight and then extracted with dichloromethane and water, the organic solvent was evaporated under reduced pressure and the residue was purified by column chromatography on silica gel by  $\text{CH}_2\text{Cl}_2$ : petroleum ether =1:4 to give the product as a yellow solid. Then, to a mixture of the compound obtained 1.48 g (estimated the monobromide compound is 70%), bis(pinacolato) diboron (0.28 g, 1.12 mmol), KAc (0.55 g, 5.6 mmol) dissolved in 1,4-dioxane 50 mL in a round bottom flask. The mixed solution was bubbled with nitrogen for 15 min. After that, the  $\text{Pd(dppf)}_2\text{Cl}_2$  (17 mg, 0.015 mmol) were added into the flask. is heated at  $85^\circ\text{C}$  for overnight. After cooling to room temperature, the mixture was extracted with dichloromethane and water, then purified by column chromatography on silica gel by  $\text{CH}_2\text{Cl}_2$ : petroleum ether (1:2, v/v) to obtain yellow solid. Melting point:  $129\text{-}131^\circ\text{C}$ . IR ( $\text{cm}^{-1}$ ) 3041  $\nu_{\text{=CH}}$ ; 2951  $\nu_{\text{-CH}^{\text{as}}}$ ; 2857  $\nu_{\text{-CH}^{\text{s}}}$ ; 1601, 1450  $\nu$  benzene ring; 1465  $\delta_{\text{CH}}$ ; 1363  $\nu_{\text{C-N(donor)}}$ ; 1273  $\nu_{\text{C-O-C}}$ ; 727  $\nu_{\text{(CH}_2\text{)}_n}$ .  $^1\text{H NMR}$  (500 MHz,  $\text{CDCl}_3$ )  $\delta$  8.47 (s, 1H), 8.21 (s, 1H), 8.12 (s, 1H), 8.05 (s, 1H), 7.99 (d,  $J = 8.5$  Hz, 2H), 7.94 (s, 2H), 7.89 (d, 1H), 7.77 (d, 1H), 7.62 (d, 1H), 7.49 (t,  $J = 7.5$  Hz, 1H), 7.30 (d,  $J = 8.0$  Hz 8H), 7.22 (t,  $J = 7.0$  Hz, 1H), 7.05 (d,  $J = 8.0$  Hz, 8H), 4.35 (t, 4H), 2.56 (d, 8H), 1.90 (m, 4H), 1.60 - 1.56 (m, 8H), 1.33- 1.26 (m, 48H), 0.99- 0.85 (m, 18H). MS (MALDI-TOF) m/z Calculated for  $\text{C}_{98}\text{H}_{119}\text{N}_2\text{O}_2\text{B}$  ( $\text{M}^+$ ): 1366.9365; Found, 1366.9357.

**AJ502 (4-(5-(4-(5-(5,14-dihexyl-8,8,17,17-tetrakis(4-hexylphenyl)-5,8,14,17-tetrahydro-s-indaceno[1,2-b:5,6-b']dicarbazol-3-yl)thiophen-2-yl)-2,5-bis(2-ethylhexyl)-3,6-dioxo-2,3,5,6-tetrahydropyrrolo[3,4-c]pyrrol-1-**

**yl)thiophen-2-yl)benzoic acid):** To a solution of compound 22 (150 mg, 0.11 mmol), compound 17 (150 mg, 0.2mmol),  $K_2CO_3$  (13.8 mg, 1 mmol) in 30 mL 1,4-dioxane and 5mL  $H_2O$  under nitrogen, the mixture was stirred overnight. The mixed solution was bubbled with nitrogen for 15min. After that, the  $Pd(PPh_3)_4$  (12.7 mg, 0.011 mmol) were added into the flask. is heated at 85 °C for overnight. After cooling to room temperature, the mixture was extracted with dichloromethane and water. After removal of solvent, the crude product was purified on a silica-gel column chromatography with  $CH_2Cl_2:CH_3OH=20:1$  as eluent to give a product as blue solid (66.3%). After then, the product was dissolved in  $H_2O$  (10 mL) and THF (30 mL),  $KOH$  (440 mg, 3.17 mmol) dissolved in water was added and refluxed 36 h. After cooling to room temperature, 2 M  $HCl$  was added slowly in 2 h for neutralizing to  $pH=1-3$ , the organic was collected and evaporated to obtain an orange solid. The residue was purified by chromatography using  $CH_2Cl_2$  to provide **AJ502** as a dark blue solid (95%). Melting point:158-160 °C. IR ( $cm^{-1}$ ) 3051  $\nu_{=CH}$ ; 2953  $\nu_{-CH^{as}}$ , 2849  $\nu_{-CH^s}$ ; 1602, 1504  $\nu$  benzene ring;1657  $\nu_{-C=O(acylamino)}$ ; 1682  $\nu_{-C=O(carboxyl)}$ ; 1460  $\delta_{-CH}$ ; 1370  $\nu_{-C-N}$ ; 1271  $\nu_{-C-O-C}$ ; 727  $\nu_{-(CH_2)_m}$ .  $^1H$  NMR (500 MHz,  $CDCl_3$ )  $\delta$   $^1H$  NMR (500 MHz,  $CDCl_3$ ) 8.99 (d,  $J = 4.0$  HZ, 2H), 8.26 (s, 2H), 8.14 (d,  $J = 8.0$  HZ, 2H), 7.99 (s, 2H), 7.91 (d,  $J = 8.5$  Hz, 2H), 7.73 (d,  $J = 8.0$  HZ, 2H), 7.63 (s, 2H), 7.53 (d,  $J = 4.0$  Hz, 1H), 7.50-7.46 (t,  $J = 7.5$  Hz, 2H), 7.43 (d,  $J = 8.0$  Hz 2H), 7.30 (d,  $J = 8.0$  Hz, 8H), 7.24 (d,  $J = 5.0$  Hz, 1H), 7.22 (d, 1H), 7.09 (t,  $J = 8.0$  Hz, 8H), 4.35(d, 4H), 4.13 (t,4H), 2.6-2.5 (m, 8H), 1.93-1.87 (m, 6H), 1.60 - 1.56 (m, 8H), 1.54- 1.26 (m, 58H), 1.05 - 0.77 (t, 24H).  $^{13}C$  NMR (125 MHz,  $CDCl_3$ ) 169.9, 161.6, 161.1, 155.6, 152.0, 146.6, 144.3, 143.6, 141.5, 141.4, 141.1, 140.9, 140.7, 140.5, 140.3, 139.5, 139.2, 138.5, 138.2, 137.7, 137.4, 136.3, 133.6, 130.8, 130.5, 128.9, 128.8, 127.2, 125.4, 123.1, 120.2, 117.9, 108.8, 107.1, 99.7, 72.1, 64.5, 46.1, 43.2, 42.5, 39.4, 38.6, 35.6, 31.9, 31.7, 31.5, 31.2, 30.0, 29.6, 29.2, 27.2, 26.6, 23.7, 22.4, 14.2, 10.9. MS (MALDI-TOF)  $m/z$  Calculated for  $C_{129}H_{150}N_4O_4S_2$  ( $M^+$ ): 1883.1099; Found, 1884.1145.

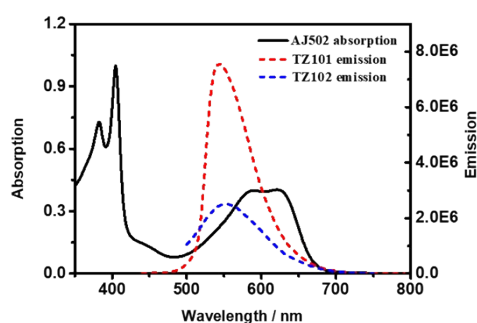

**Figure S1.** Emission spectra of single dye dissolved in PhMe

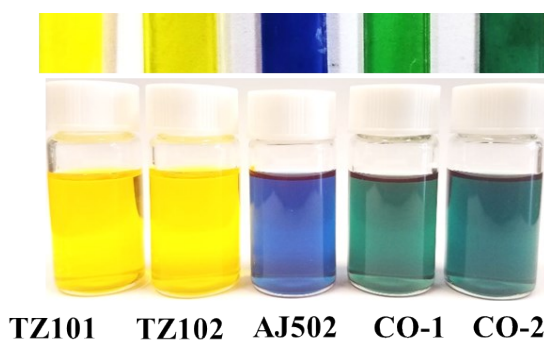

**TZ101 TZ102 AJ502 CO-1 CO-2**



**Figure S2.** The photographs of dyes and co-sensitizations in solution and on TiO<sub>2</sub> film.

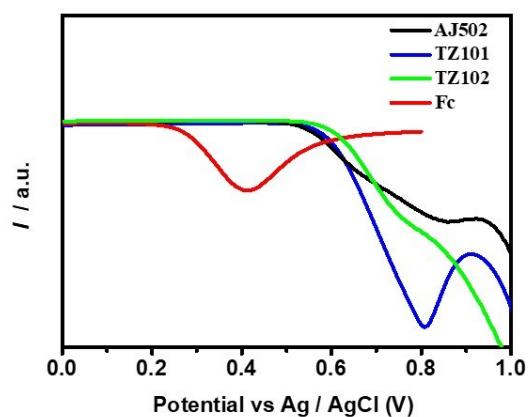

**Figure S3.** DPV curves of AJ502, TZ101, and TZ102 measured in acetonitrile with 0.1 M TBAPF<sub>6</sub> as supporting electrolyte. Fc/Fc<sup>+</sup> added as inner standard.

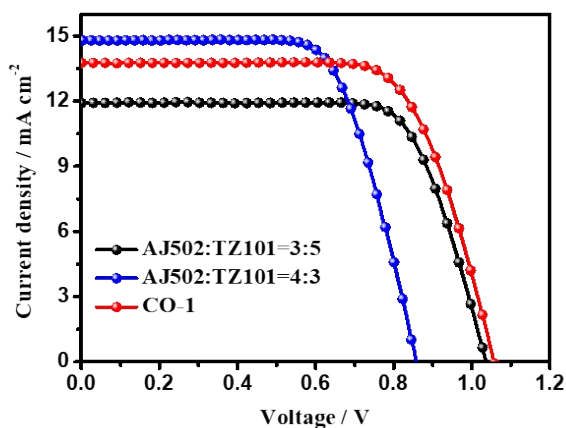

**Figure S4.** Data for devices based on different concentration ratios.

**Table S1** Photovoltaic performance of DSSCs sensitized by different concentration ratios

| Dye         | Concentration ratios | $J_{sc}$ [mA·cm <sup>-2</sup> ] | $V_{oc}$ [V] | $FF$ [%] | PCE [%] |
|-------------|----------------------|---------------------------------|--------------|----------|---------|
| AJ502:TZ101 | 4:3                  | 15.7                            | 0.87         | 68.7     | 9.4     |
| AJ502:TZ101 | 3:5                  | 11.9                            | 1.03         | 73.6     | 9.1     |

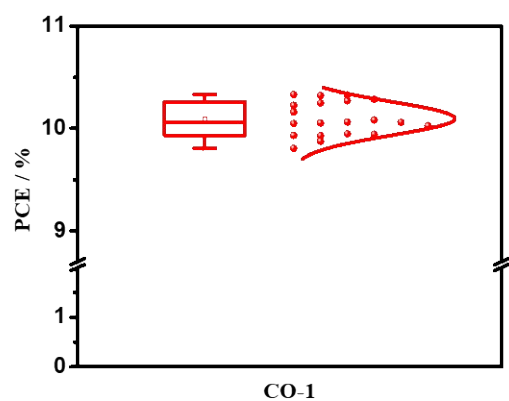

Figure S5. PCE performance based on 20 fresh devices sensitized by Co-1

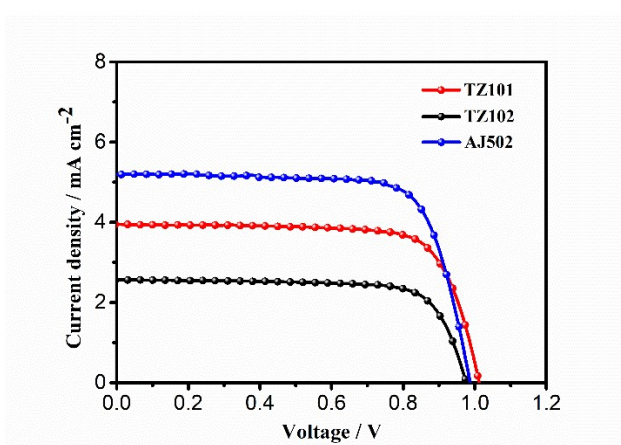

Figure S6.  $J$ - $V$  curves of DSSCs sensitized by AJ502, TZ101, TZ102 with CDCA.

Table S2 Photovoltaic performance parameters of DSSCs sensitized by AJ502, TZ101, TZ102 with 2M CDCA

| Dye   | $J_{sc}$<br>[mA·cm <sup>-2</sup> ] | $V_{oc}$<br>[V] | $FF$<br>[%] | PCE<br>[%] |
|-------|------------------------------------|-----------------|-------------|------------|
| AJ502 | 5.85                               | 0.98            | 74.5        | 4.30       |
| TZ101 | 3.94                               | 1.01            | 74.7        | 2.98       |
| TZ102 | 2.55                               | 0.97            | 75.4        | 1.87       |

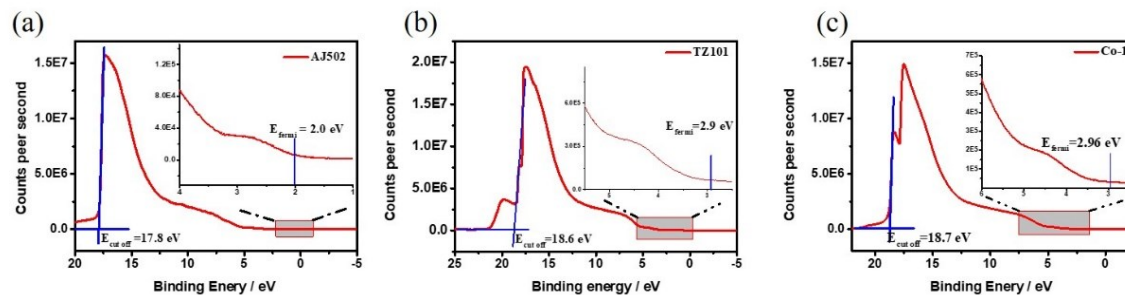

Figure S7. Ultraviolet Photoelectron Spectra of (a) AJ502, (b) TZ101, (c) Co-1 deposited on TiO<sub>2</sub>

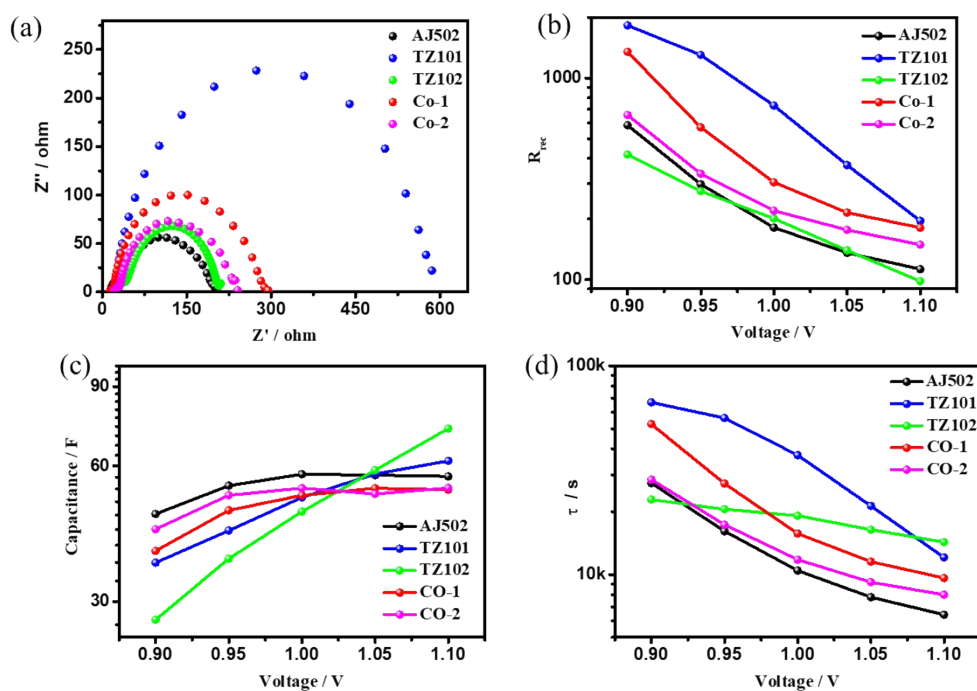

**Figure S8.** EIS analysis data: (a) Nyquist plots under forward bias of 1.05 V, (b) recombination resistance  $R_{rec}$  (c) chemical capacitance  $C_{\mu}$ , and (d) electron lifetime  $\tau$  plots.

**Table S3.** Photovoltaic parameters of containing DPP dyes based on traditional electrolyte redox couples under standard AM1.5G, 100 mW cm<sup>-2</sup> condition.

| Dyes        | electrolyte                                 | $J_{sc}$ (mA cm <sup>-2</sup> ) | $V_{oc}$ (V) | FF (%) | PCE (%) | Ref. |
|-------------|---------------------------------------------|---------------------------------|--------------|--------|---------|------|
| DPP-I       | I <sup>-</sup> /I <sub>3</sub> <sup>-</sup> | 9.78                            | 0.605        | 70     | 4.14    | 6    |
| DPP-II      | I <sup>-</sup> /I <sub>3</sub> <sup>-</sup> | 2.39                            | 0.508        | 68     | 0.83    | 6    |
| QS-DPP-I    | I <sup>-</sup> /I <sub>3</sub> <sup>-</sup> | 10.73                           | 0.659        | 61     | 4.32    | 7    |
| 3+ QS-DPP-I | I <sup>-</sup> /I <sub>3</sub> <sup>-</sup> | 12.99                           | 0.685        | 67     | 5.95    | 7    |
| DB          | Co <sup>2+</sup> /Co <sup>3+</sup>          | 13.21                           | 0.757        | 72.7   | 7.3     | 8    |
| DB/D35      | Co <sup>2+</sup> /Co <sup>3+</sup>          | 15.6                            | 0.797        | 70.1   | 8.7     | 8    |
| DPP01       | I <sup>-</sup> /I <sub>3</sub> <sup>-</sup> | 8.66                            | 0.55         | 72     | 3.41    | 9    |
| DPP02       | I <sup>-</sup> /I <sub>3</sub> <sup>-</sup> | 5.04                            | 0.52         | 73     | 1.92    | 9    |
| DPP03       | I <sup>-</sup> /I <sub>3</sub> <sup>-</sup> | 11.9                            | 0.64         | 65     | 4.93    | 9    |
| DPP04       | I <sup>-</sup> /I <sub>3</sub> <sup>-</sup> | 5.49                            | 0.58         | 72     | 2.31    | 9    |
| DPP07       | I <sup>-</sup> /I <sub>3</sub> <sup>-</sup> | 15.6                            | 0.676        | 73     | 7.67    | 10   |
|             | Co <sup>2+</sup> /Co <sup>3+</sup>          | 15.5                            | 0.735        | 76     | 8.74    | 10   |
| DPP10       | I <sup>-</sup> /I <sub>3</sub> <sup>-</sup> | 12.4                            | 0.655        | 70     | 5.67    | 10   |
|             | Co <sup>2+</sup> /Co <sup>3+</sup>          | 12.7                            | 0.693        | 76     | 6.7     | 10   |
| DPP12       | I <sup>-</sup> /I <sub>3</sub> <sup>-</sup> | 16.1                            | 0.717        | 67     | 7.74    | 10   |
|             | Co <sup>2+</sup> /Co <sup>3+</sup>          | 14.3                            | 0.737        | 76     | 8.01    | 10   |
| YCD01       | I <sup>-</sup> /I <sub>3</sub> <sup>-</sup> | 13.4                            | 0.76         | 73     | 7.43    | 11   |
| TDPP        | I <sup>-</sup> /I <sub>3</sub> <sup>-</sup> | 10.4                            | 0.68         | 64     | 4.82    | 12   |
| SPS-01+TDPP | I <sup>-</sup> /I <sub>3</sub> <sup>-</sup> | 15.2                            | 0.72         | 74     | 8.1     | 12   |

|                   |                                             |       |       |    |       |    |
|-------------------|---------------------------------------------|-------|-------|----|-------|----|
| <b>XW3</b>        | I <sup>-</sup> /I <sub>3</sub> <sup>-</sup> | 15.73 | 0.748 | 68 | 8.02  | 13 |
| <b>XW3+XW4</b>    | I <sup>-</sup> /I <sub>3</sub> <sup>-</sup> | 19.96 | 0.728 | 74 | 10.75 | 13 |
| <b>DPP13</b>      | I <sup>-</sup> /I <sub>3</sub> <sup>-</sup> | 16.2  | 0.705 | 68 | 7.67  | 14 |
|                   | Co <sup>2+</sup> /Co <sup>3+</sup>          | 15.6  | 0.743 | 78 | 8.97  | 14 |
| <b>DPP14</b>      | I <sup>-</sup> /I <sub>3</sub> <sup>-</sup> | 16.6  | 0.680 | 68 | 7.73  | 14 |
|                   | Co <sup>2+</sup> /Co <sup>3+</sup>          | 15.2  | 0.716 | 76 | 8.23  | 14 |
| <b>DPP15</b>      | I <sup>-</sup> /I <sub>3</sub> <sup>-</sup> | 16.9  | 0.684 | 65 | 7.44  | 14 |
|                   | Co <sup>2+</sup> /Co <sup>3+</sup>          | 17.6  | 0.745 | 75 | 9.81  | 14 |
| <b>DPP17</b>      | I <sup>-</sup> /I <sub>3</sub> <sup>-</sup> | 16.3  | 0.700 | 63 | 7.13  | 14 |
|                   | Co <sup>2+</sup> /Co <sup>3+</sup>          | 17.9  | 0.761 | 74 | 10.1  | 14 |
| <b>DPP07+NT35</b> | I <sup>-</sup> /I <sub>3</sub> <sup>-</sup> | 16.9  | 0.69  | 71 | 8.31  | 15 |
| <b>DPP07+D35</b>  | I <sup>-</sup> /I <sub>3</sub> <sup>-</sup> | 12.2  | 0.76  | 71 | 6.56  | 15 |
| <b>ICD-1</b>      | I <sup>-</sup> /I <sub>3</sub> <sup>-</sup> | 16.65 | 0.708 | 73 | 8.61  | 16 |
| <b>ICD-2</b>      | I <sup>-</sup> /I <sub>3</sub> <sup>-</sup> | 13.67 | 0.712 | 74 | 7.2   | 16 |

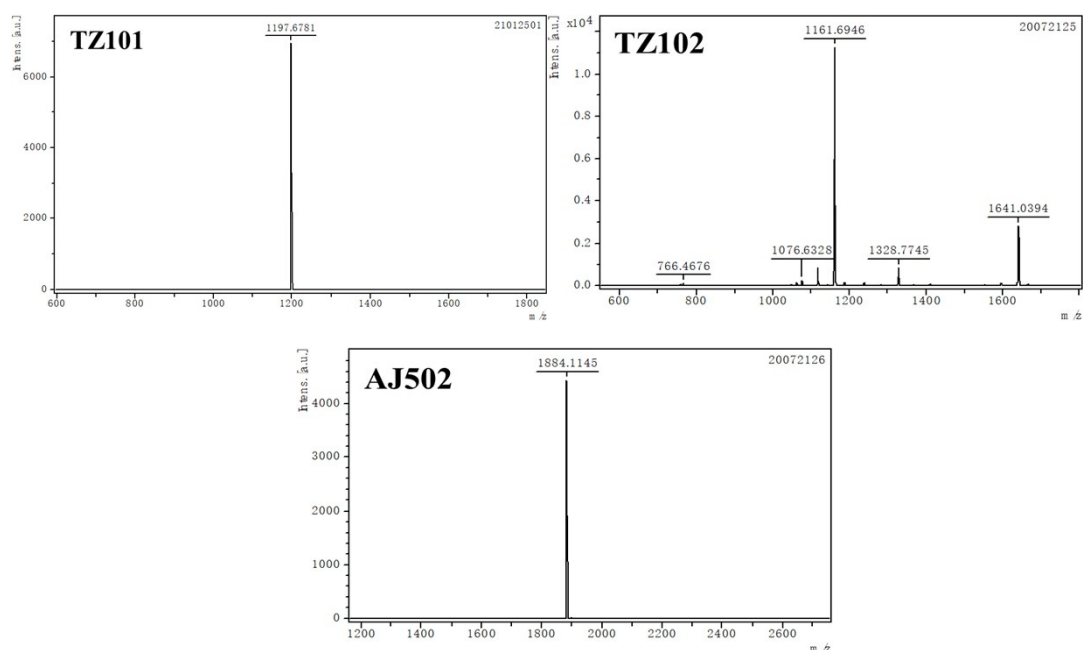

**Figure S9.** MALDI-TFO-MS of **TZ101**, **TZ102** and **AJ502**

## References

- 1 H.-C. Chu, D. Sahu, Y.-C. Hsu, H. Padhy, D. Patra, J.-T. S. Lin, D. Bhattacharya, K.-L. Lu, K.-H. Wei, H.-C. Lin, *Dyes and Pigments* 2012, 93, 1488 - 1497.
- 2 P. J. Holliman, M. L. Davies, A. Connell, B. Vaca Velasco, T. M Watson, *Chem. Commun.* 2010, 46, 7256-7258.
- 3 K. Kakiage, Y. Aoyama, T. Yano, K. Oya, J. Fujisawa, M. Hanaya, *Chem. Commun.* 2015, 51, 15894 - 15897.
- 4 C.-H. Yang, P.-Y. Chen, W.-J. Chen, T.-L. Wang, Y.-T. Shieh, *Electrochimica Acta* 2013, 107, 170 - 177.
- 5 A. Yella, H.-W. Lee, H. N. Tsao, C. Yi, A. K. Chandiran, M. K. Nazeeruddin, E. W.-G. Diao, C.-Y. Yeh, S. M. Zakeeruddin, M. Grätzel, *Science* 2011, 334, 629.
- 6 S. Qu, W. Wu, J. Hua, C. Kong, Y. Long, and H. Tian, *J. Phys. Chem. C* 2010, 114, 1343–1349.
- 7 Q. Wang, W. Wu, C.-L. Ho, L. Xue, Z. Lin, H. Li, Y. H. Lo, and W.-Y. Wong, *Eur. J. Inorg. Chem.* 2014, 5322–5330.

- 8 Y. Hao, Y. Saygili, J. Cong, A. Eriksson, W. Yang, J. Zhang, E. Polanski, K. Nonomura, S. M. Zakeeruddin, M. Gratzel, A. Hagfeldt and G. Boschloo, *ACS Appl. Mater. Interfaces*, 2016, 8, 32797-32804.
- 9 T. W. Holcombe, J. H. Yum, J. Yoon, P. Gao, M. Marszalek, D. Di Censo, K. Rakstys, M. K. Nazeeruddin and M. Gratzel, *Chem. Commun.*, 2012, 48, 10724-10726.
- 10 T. W. Holcombe, J.-H. Yum, Y. Kim, K. Rakstys and M. Grätzel, *J. Mater. Chem. A*, 2013, 1, 13978-13983.
- 11 M. Katono, T. Bessho, M. Wielopolski, M. Marszalek, J.-E. Moser, R. Humphry-Baker, S. M. Zakeeruddin and M. Grätzel, *J. Phys. Chem. C*, 2012, 116, 16876-16884.
- 12 G. D. Sharma, M. S. Roy and S. P. Singh, *J. Mater. Chem.*, 2012, 22, 18788-18792.
- 13 X. Sun, Y. Wang, X. Li, H. Agren, W. Zhu, H. Tian and Y. Xie, *Chem. Commun.*, 2014, 50, 15609-15612.
- 14 J. H. Yum, T. W. Holcombe, Y. Kim, K. Rakstys, T. Moehl, J. Teuscher, J. H. Delcamp, M. K. Nazeeruddin and M. Gratzel, *Sci. Rep.*, 2013, 3, 2446.
- 15 J. H. Yum, T. W. Holcombe, Y. Kim, J. Yoon, K. Rakstys, M. K. Nazeeruddin and M. Gratzel, *Chem. Commun.*, 2012, 48, 10727-10729.
- 16 F. Zhang, K.-J. Jiang, J.-H. Huang, C.-C. Yu, S.-G. Li, M.-G. Chen, L.-M. Yang and Y.-L. Song, *J. Mater. Chem. A*, 2013, 1, 4858-4863.
